# Supplementary material for: Mycoplasma pneumoniae and Adenovirus Coinfection Cause Pediatric Severe Community-Acquired Pneumonia
Source: PubMed Central journal article supplement (PMC9045297; doi:10.1128/spectrum.00026-22), 2022-03-21
Supplement: spectrum00026-22_supp_1_seq7.pdf [file spectrum00026-22_supp_1_seq7.pdf]

## **Figure Legend**

**Supplemental Figure.** Quality control of RespiFinder 2SMART Multi-PCR. Quality control was set follow the manual by confirmation the amplification of the target and the control based on the melting curves.

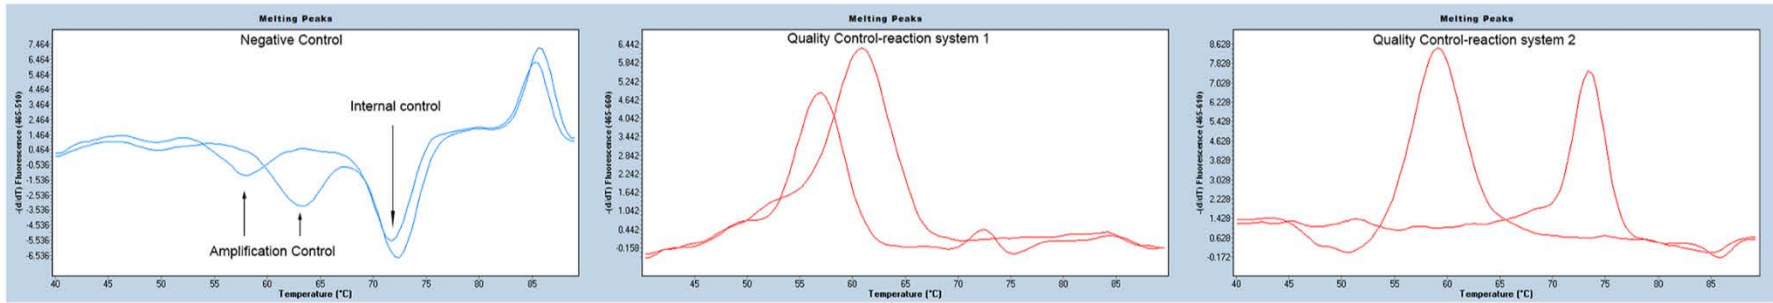

Negative control and quality control of the multiplex PCR system

| Clinical information of 90 cases |       |                                  |           |                                                                                                                                       |                                                                                                                |                      |                                                               |                                        |                                              |                                                   |                               |                     |
|----------------------------------|-------|----------------------------------|-----------|---------------------------------------------------------------------------------------------------------------------------------------|----------------------------------------------------------------------------------------------------------------|----------------------|---------------------------------------------------------------|----------------------------------------|----------------------------------------------|---------------------------------------------------|-------------------------------|---------------------|
| Sample ID                        | Month | Gender :1 for male, 2 for female | Age(year) | Discharged with Diagnosis                                                                                                             | Imaging:1 for the chest X-ray, 2 for CT scan-chest:                                                            | Multiple PCR results | DFA (1.RSV 2.FLU A 3.FLU B 4.PIV1 5.PIV2 6.PIV3 7.ADV 8.hMPV) | Real-time RT-PCR for rhinoviruses (RV) | Real-time PCR for Mycoplasma pneumoniae (MP) | Serum antibodies against M. hyopneumoniae(MP-IgM) | Alveolar Lavage Fluid Culture | Underlying diseases |
| S1                               | 1     | 2                                | 8.6       | Severe pneumonia, lung consolidation, pleural effusion, refractory mycoplasma infection, liver damage, hypoproteinemia                | 2.Left lower lung pneumonia, right lung consolidation, pleural effusion                                        | hMPV、MP              | 0                                                             | 0                                      | > 1.00E+08                                   | 1:1280                                            | 0                             | 0                   |
| S2                               | 1     | 2                                | 1.2       | Interstitial pneumonia, EBV/CMV infection, rhinovirus infection, mycoplasma pneumoniae infection, thrombocytopenia, immunodeficiency? | 1.Interstitial pneumonia<br>.2.Interstitial pneumonia                                                          | MP、HCoV-OC43         | 0                                                             | 1                                      | 4.48E+03                                     | 1:160                                             | 0                             | 0                   |
| S3                               | 1     | 2                                | 9.3       | Pneumonia                                                                                                                             | 1.Left lung pneumonia. 2.Left lung pneumonia                                                                   | ADV、MP               | 0                                                             | 0                                      | 1.13E+06                                     | 1:1280                                            | 0                             | 0                   |
| S4                               | 1     | 2                                | 7         | Mycoplasma pneumoniae pneumonia, lung consolidation                                                                                   | 1.Right lung pneumoniae                                                                                        | ADV、MP               | 0                                                             | 0                                      | 2.48E+07                                     | 1:1280                                            | 0                             | 0                   |
| S5                               | 1     | 2                                | 6.7       | Mycoplasma pneumoniae pneumonia, lung consolidation                                                                                   | 1.Left pneumonia with subsegment consolidation.2. Left lung pneumonia with partial consolidation               | ADV、HBoV、MP          | 0                                                             | 0                                      | 1.04E+07                                     | 1:1280                                            | 0                             | 0                   |
| S6                               | 1     | 1                                | 1.5       | Pneumonia, lung consolidation                                                                                                         | 1. Left lower lung pneumonia with consolidation.2.Bilateral lung pneumonia with multiple segmental atelectasis | ADV、MP               | 1.7                                                           | 0                                      | 1.98E+04                                     | 0                                                 | 0                             | 0                   |
| S7                               | 1     | 2                                | 10.3      | Mycoplasma pneumoniae pneumonia, lung consolidation                                                                                   | 1. Left lung pneumonia.2 left lung pneumonia with partial atelectasis                                          | ADV、MP               | 0                                                             | 0                                      | 6.88E+06                                     | 1:640                                             | 0                             | 0                   |

| Clinical information of 90 cases |       |                                  |           |                                                                                            |                                                                                                        |                      |                                                               |                                        |                                              |                                                   |                               |                     |
|----------------------------------|-------|----------------------------------|-----------|--------------------------------------------------------------------------------------------|--------------------------------------------------------------------------------------------------------|----------------------|---------------------------------------------------------------|----------------------------------------|----------------------------------------------|---------------------------------------------------|-------------------------------|---------------------|
| Sample ID                        | Month | Gender :1 for male, 2 for female | Age(year) | Discharged with Diagnosis                                                                  | Imaging:1 for the chest X-ray, 2 for CT scan-chest:                                                    | Multiple PCR results | DFA (1.RSV 2.FLU A 3.FLU B 4.PIV1 5.PIV2 6.PIV3 7.ADV 8.hMPV) | Real-time RT-PCR for rhinoviruses (RV) | Real-time PCR for Mycoplasma pneumoniae (MP) | Serum antibodies against M. hyopneumoniae(MP-IgM) | Alveolar Lavage Fluid Culture | Underlying diseases |
| S8                               | 1     | 2                                | 7.4       | Pneumonia, lung consolidation                                                              | 2. Left lower lung pneumonia with atelectasis, lung consolidation                                      | MP                   | 0                                                             | 0                                      | 8.00E+05                                     | 1:160                                             | 0                             | 0                   |
| S9                               | 1     | 1                                | 7.1       | Influenza (influenza A), severe pneumonia (consolidation), febrile convulsion              | 1.Bronchopneumonia.2.Bilateral pneumonia, lower left lung atelectasis, bilateral lung pleural effusion | ADV、FLUA             | 2                                                             | 0                                      | 0                                            | 0                                                 | 0                             | 0                   |
| S10                              | 1     | 1                                | 3.6       | Mycoplasma pneumoniae pneumonia, influenza                                                 | 1.Bilateral pneumonia with partial consolidation.2.Pneumonia, bilateral pleural effusion               | ADV、MP、H1N1          | 2                                                             | 0                                      | 5.95E+07                                     | 1:1280                                            | 0                             | 0                   |
| S11                              | 1     | 1                                | 1.6       | Pneumonia, respiratory syncytial virus infection                                           | 1Pneumonia                                                                                             | RSV-A、MP             | 1.2                                                           | 0                                      | 2.85E+03                                     | 1:160                                             | 0                             | 0                   |
| S12                              | 1     | 2                                | 7         | Mycoplasma pneumoniae pneumonia (associated with rhinovirus infection), lung consolidation | 1.Pneumonia, ght lung atelectasis                                                                      | RV/EV、MP             | 0                                                             | 1                                      | /                                            | 1:1280                                            | 0                             | 0                   |
| S13                              | 1     | 1                                | 3.6       | Pneumonia                                                                                  | 1.Left lung pneumonia                                                                                  | MP                   | 0                                                             | 0                                      | /                                            | /                                                 | 0                             | 0                   |
| S14                              | 1     | 1                                | 12        | Pneumonia, lung consolidation                                                              | 1Pneumonia 2.Pneumonia, lung consolidation                                                             | ADV、MP               | 0                                                             | 0                                      | 0                                            | 0                                                 | 0                             | 0                   |

| Clinical information of 90 cases |       |                                  |           |                                                                                                                          |                                                                                                                    |                      |                                                               |                                        |                                              |                                                   |                               |                                         |  |
|----------------------------------|-------|----------------------------------|-----------|--------------------------------------------------------------------------------------------------------------------------|--------------------------------------------------------------------------------------------------------------------|----------------------|---------------------------------------------------------------|----------------------------------------|----------------------------------------------|---------------------------------------------------|-------------------------------|-----------------------------------------|--|
| Sample ID                        | Month | Gender :1 for male, 2 for female | Age(year) | Discharged with Diagnosis                                                                                                | Imaging:1 for the chest X-ray, 2 for CT scan-chest:                                                                | Multiple PCR results | DFA (1.RSV 2.FLU A 3.FLU B 4.PIV1 5.PIV2 6.PIV3 7.ADV 8.hMPV) | Real-time RT-PCR for rhinoviruses (RV) | Real-time PCR for Mycoplasma pneumoniae (MP) | Serum antibodies against M. hyopneumoniae(MP-IgM) | Alveolar Lavage Fluid Culture | Underlying diseases                     |  |
| S15                              | 1     | 1                                | 3.8       | Mycoplasma pneumoniae pneumonia, lung consolidation                                                                      | 1.Bronchopneumonia.2.Pneumonia and left lower lung consolidation.                                                  | MP                   | 0                                                             | 0                                      | 8.23E+07                                     | 1:1280                                            | 0                             | 0                                       |  |
| S16                              | 1     | 1                                | 3.1       | Pneumonia (lung consolidation) (mycoplasma pneumoniae, adenovirus, respiratory syncytial virus), pleural effusion (left) | 1. Bilateral pneumonia. 2.Left lung pneumonia with consolidation, pleural effusion                                 | MP、HCoV-OC43         | 2.7                                                           | 0                                      | 9.48E+03                                     | 0                                                 | 0                             | 0                                       |  |
| S17                              | 1     | 1                                | 6         | Pneumonia                                                                                                                | 1.Right lung pneumonia with partial consolidation                                                                  | ADV、MP               | 0                                                             | 0                                      | 2.12E+07                                     | 1:1280                                            | 0                             | 0                                       |  |
| S18                              | 1     | 1                                | 12        | Pneumonia, Immunodeficiency disease (PIK3CD mutation), bronchiectasis, fungal infection, proteinuria                     | 1.Bronchopneumonia, bilateral pleural reaction.2.Bilateral bronchiectasis with pneumonia and segmental atelectasis | ADV、MP               | 0                                                             | 0                                      | 0                                            | /                                                 | 0                             | Immune deficiency(PIK3CD gene mutation) |  |
| S19                              | 2     | 1                                | 1.3       | Pneumonia, respiratory syncytial virus infection, adenovirus infection, rotavirus enteritis                              | 1.Pneumonia. 2.Pneumonia, left upper lobe subsegmental consolidation                                               | ADV、MP、HCoV-OC43     | 1.7                                                           | 0                                      | 0                                            | 0                                                 | 0                             | 0                                       |  |
| S20                              | 2     | 1                                | 7         | Mycoplasma pneumoniae pneumonia, lung consolidation, pleural effusion                                                    | 2.The left pneumonia with multiple segment consolidation and atresness, left lung pleural effusion                 | ADV、FLUA、MP、H1N1     | 0                                                             | 0                                      | 8.90E+06                                     | 1:1280                                            | 0                             | 0                                       |  |
| S21                              | 2     | 2                                | 6         | Mycoplasma pneumoniae pneumonia, lung consolidation                                                                      | 1.Left lung pneumonia.2.Pneumonia, left upper lobe subsegment atelectasis.                                         | ADV、MP               | 0                                                             | 0                                      | 1.06E+04                                     | 1:1280                                            | 0                             | 0                                       |  |

| Clinical information of 90 cases |       |                                  |           |                                                                                                                                                                                  |                                                                                                                    |                      |                                                               |                                        |                                              |                                                   |                               |                                        |
|----------------------------------|-------|----------------------------------|-----------|----------------------------------------------------------------------------------------------------------------------------------------------------------------------------------|--------------------------------------------------------------------------------------------------------------------|----------------------|---------------------------------------------------------------|----------------------------------------|----------------------------------------------|---------------------------------------------------|-------------------------------|----------------------------------------|
| Sample ID                        | Month | Gender :1 for male, 2 for female | Age(year) | Discharged with Diagnosis                                                                                                                                                        | Imaging:1 for the chest X-ray, 2 for CT scan-chest:                                                                | Multiple PCR results | DFA (1.RSV 2.FLU A 3.FLU B 4.PIV1 5.PIV2 6.PIV3 7.ADV 8.hMPV) | Real-time RT-PCR for rhinoviruses (RV) | Real-time PCR for Mycoplasma pneumoniae (MP) | Serum antibodies against M. hyopneumoniae(MP-IgM) | Alveolar Lavage Fluid Culture | Underlying diseases                    |
| S22                              | 2     | 1                                | 0.4       | Pulmonary infection, lung consolidation, adenovirus infection, low gamma globulin, infant diarrhea, abnormal liver function, convulsions (cause of convulsions to be determined) | 1.Bronchopneumonia.2Pneumonia, right lower lobe partial consolidation and atelectasis, right lung pleural effusion | ADV、MP               | 7                                                             | 0                                      | 0                                            | 0                                                 | 0                             | Immune deficiency(α-gammaglobulinemia) |
| S23                              | 2     | 1                                | 4.1       | Pneumonia, lung consolidation                                                                                                                                                    | 1.Right upper lobe pneumonia with partial atelectasis, lung consolidation                                          | ADV、MP               | 0                                                             | 0                                      | 0                                            | 0                                                 | 0                             | 0                                      |
| S24                              | 2     | 1                                | 10        | Pneumonia, lung consolidation                                                                                                                                                    | 1.Right lung pneumonia, lung consolidation                                                                         | ADV、HBoV、MP          | 0                                                             | 0                                      | 5.83E+07                                     | 1:1280                                            | 0                             | 0                                      |
| S25                              | 2     | 2                                | 7         | Mycoplasma pneumoniae, lung consolidation, acute submandibular adenitis, urticaria, acute gastroenteritis                                                                        | 1.Pneumonia.2.Pneumonias, middle lobe atelectasis, lung consolidation                                              | FLUA、MP              | 0                                                             | 0                                      | 1.13E+06                                     | 1:1280                                            | 0                             | 0                                      |
| S26                              | 2     | 2                                | 7         | Pneumonia, acute gastroenteritis                                                                                                                                                 | 1.Bronchopneumonia.2.Pneumonia                                                                                     | FLUA、HBoV、MP、H1N1    | 0                                                             | 0                                      | 0                                            | 0                                                 | 0                             | 0                                      |
| S27                              | 2     | 1                                | 6         | Mycoplasma pneumoniae pneumonia, lung consolidation                                                                                                                              | 1.Right upper lobe pneumonia with atelectasis.2.Right lung pneumonia with right upper lobe segmental atelectasis   | ADV、MP               | 0                                                             | 0                                      | 2.48E+07                                     | 1:640                                             | 0                             | 0                                      |

| Clinical information of 90 cases |       |                                  |           |                                                                                                          |                                                                                                                               |                             |                                                               |                                        |                                              |                                                    |                               |                     |
|----------------------------------|-------|----------------------------------|-----------|----------------------------------------------------------------------------------------------------------|-------------------------------------------------------------------------------------------------------------------------------|-----------------------------|---------------------------------------------------------------|----------------------------------------|----------------------------------------------|----------------------------------------------------|-------------------------------|---------------------|
| Sample ID                        | Month | Gender :1 for male, 2 for female | Age(year) | Discharged with Diagnosis                                                                                | Imaging:1 for the chest X-ray, 2 for CT scan-chest:                                                                           | Multiple PCR results        | DFA (1.RSV 2.FLU A 3.FLU B 4.PIV1 5.PIV2 6.PIV3 7.ADV 8.hMPV) | Real-time RT-PCR for rhinoviruses (RV) | Real-time PCR for Mycoplasma pneumoniae (MP) | Serum antibodies against M. hypopneumoniae(MP-IgM) | Alveolar Lavage Fluid Culture | Underlying diseases |
| S28                              | 2     | 1                                | 9         | Mycoplasma pneumoniae pneumonia, lung consolidation, pleural effusion (right)                            | 1.Pneumonia with lung consolidation, pleural effusion.2.Bilateral pneumonia, right lower lung consolidation, pleural effusion | FLUA、HBoV、MP、HCoV-NL63/HKU1 | 0                                                             | 0                                      | 8.08E+06                                     | 1:1280                                             | 0                             | 0                   |
| S29                              | 2     | 1                                | 9         | Mycoplasma pneumoniae pneumonia, lung consolidation                                                      | 1.Right upper lobe pneumonia with segmentary atelectasis                                                                      | ADV、MP                      | 0                                                             | 0                                      | 2.35E+06                                     | 1:1280                                             | 0                             | 0                   |
| S30                              | 2     | 2                                | 2.5       | Pneumonia, lung consolidation                                                                            | 1.Right upper lung pneumonia with atelectasis                                                                                 | ADV、MP、H1N1                 | 0                                                             | 0                                      | 0                                            | 0                                                  | 0                             | 0                   |
| S31                              | 2     | 1                                | 2.9       | Pneumonia                                                                                                | 2. Right upper lobe pneumonia                                                                                                 | ADV、MP                      | 0                                                             | 0                                      | 0                                            | 1:160                                              | 0                             | 0                   |
| S32                              | 2     | 1                                | 9         | Mycoplasma pneumoniae pneumonia, lung consolidation, pleural effusion                                    | 2.Bilateral pneumonia, right lower lobe consolidation, pleural effusion                                                       | FLUA、HBoV、MP                | 0                                                             | 0                                      | 1.15E+-6                                     | 1:1280                                             | 0                             | 0                   |
| S33                              | 2     | 2                                | 13        | Pneumonia, lung consolidation, (refractory) pneumonia mycoplasma infection, adenovirus infection         | 1. Right lung pneumonia                                                                                                       | ADV、MP                      | 7                                                             | 0                                      | 6.65E+04                                     | 1:1280                                             | 0                             | 0                   |
| S34                              | 2     | 1                                | 1.3       | Pneumonia, lung consolidation, streptococcus pneumoniae infection, pleural effusion, rotavirus enteritis | 1. Right lung pneumonia with segmental atelectasis, pleural effusion                                                          | ADV、MP                      | 0                                                             | 0                                      | 0                                            | 0                                                  | Streptococcus pneumoniae      | 0                   |

| Clinical information of 90 cases |       |                                  |           |                                                                                                                                                   |                                                                            |                        |                                                               |                                        |                                              |                                                   |                               |                                        |
|----------------------------------|-------|----------------------------------|-----------|---------------------------------------------------------------------------------------------------------------------------------------------------|----------------------------------------------------------------------------|------------------------|---------------------------------------------------------------|----------------------------------------|----------------------------------------------|---------------------------------------------------|-------------------------------|----------------------------------------|
| Sample ID                        | Month | Gender :1 for male, 2 for female | Age(year) | Discharged with Diagnosis                                                                                                                         | Imaging:1 for the chest X-ray, 2 for CT scan-chest:                        | Multiple PCR results   | DFA (1.RSV 2.FLU A 3.FLU B 4.PIV1 5.PIV2 6.PIV3 7.ADV 8.hMPV) | Real-time RT-PCR for rhinoviruses (RV) | Real-time PCR for Mycoplasma pneumoniae (MP) | Serum antibodies against M. hyopneumoniae(MP-IgM) | Alveolar Lavage Fluid Culture | Underlying diseases                    |
| S35                              | 2     | 1                                | 7         | Mycoplasma pneumoniae pneumonia, lung consolidation, pleural effusion                                                                             | 1.Right lung pneumonia with lung consolidation, pleural effusion           | ADV、MP                 | 0                                                             | 0                                      | 1.43E+06                                     | 1:1280                                            | 0                             | 0                                      |
| S36                              | 2     | 2                                | 8         | Pneumonia, lung consolidation, (refractory) mycoplasma pneumonia infection, adenovirus infection, pleural effusion, hypoproteinemia               | 1.Pneumonia with consolidation, pleural effusion                           | ADV、MP                 | 7                                                             | 0                                      | 5.60E+05                                     | 1:1280                                            | 0                             | 0                                      |
| S37                              | 2     | 2                                | 6         | Pneumonia, lung consolidation                                                                                                                     | 1.Right upper lobe pneumonia with segmentary consolidation and atelectasis | ADV、MP                 | 0                                                             | 0                                      | 1.37E+05                                     | 0                                                 | 0                             | 0                                      |
| S38                              | 2     | 2                                | 8         | Pneumonia                                                                                                                                         | 1.Pneumonia.2.Bilateral lung pneumonia                                     | ADV、MP                 | 0                                                             | 0                                      | 3.93E+06                                     | 1:160                                             | 0                             | 0                                      |
| S39                              | 2     | 2                                | 0.5       | Pneumonia, lung consolidation                                                                                                                     | 1.Right lower lung pneumonia with consolidation.                           | ADV、PIV3、MP、HCoV-C229E | 0                                                             | 0                                      | /                                            | /                                                 | 0                             | 0                                      |
| S40                              | 2     | 2                                | 6         | Immunodeficiency disease (no gamma globulin), pulmonary infection.Chronic diarrhea, abnormal white blood cell (granulocytopenia), hypoproteinemia | 1.Pneumonia.2.Pneumonia, with right middle lung atelectasis                | ADV、MP                 | 0                                                             | 0                                      | 0                                            | /                                                 | 0                             | Immune deficiency(a gammaglobulinemia) |



| Clinical information of 90 cases |       |                                  |           |                                                                                                                                            |                                                                                                                                  |                      |                                                               |                                        |                                              |                                                   |                               |                                                       |
|----------------------------------|-------|----------------------------------|-----------|--------------------------------------------------------------------------------------------------------------------------------------------|----------------------------------------------------------------------------------------------------------------------------------|----------------------|---------------------------------------------------------------|----------------------------------------|----------------------------------------------|---------------------------------------------------|-------------------------------|-------------------------------------------------------|
| Sample ID                        | Month | Gender :1 for male, 2 for female | Age(year) | Discharged with Diagnosis                                                                                                                  | Imaging:1 for the chest X-ray, 2 for CT scan-chest:                                                                              | Multiple PCR results | DFA (1.RSV 2.FLU A 3.FLU B 4.PIV1 5.PIV2 6.PIV3 7.ADV 8.hMPV) | Real-time RT-PCR for rhinoviruses (RV) | Real-time PCR for Mycoplasma pneumoniae (MP) | Serum antibodies against M. hyopneumoniae(MP-IgM) | Alveolar Lavage Fluid Culture | Underlying diseases                                   |
| S41                              | 2     | 2                                | 4         | Mycoplasma pneumoniae, lung consolidation, pleural effusion, bronchiectasis, rotavirus enteritis                                           | 1.Right lung pneumonia, pleural effusion.2. Pneumonia, right lower lobe multisegmental consolidation and partial bronchodilation | ADV、MP               | 0                                                             | 0                                      | >1.00E+08                                    | 1:1280                                            | 0                             | 0                                                     |
| S42                              | 2     | 2                                | 2.3       | Pneumonia, lung consolidation                                                                                                              | 1.Bronchopneumonia, lung consolidation.2.Pneumonia, left lung consolidation                                                      | ADV、MP               | 0                                                             | 0                                      | /                                            | 1:1280                                            | /                             | 0                                                     |
| S43                              | 2     | 1                                | 2.8       | Mycoplasma pneumoniae pneumonia, lung consolidation                                                                                        | 1.Left lung pneumonia.2.Pneumonia with left upper lung consolidation atelectasis                                                 | ADV、MP               | 0                                                             | 0                                      | >1.00E+08                                    | 1:1280                                            | 0                             | 0                                                     |
| S44                              | 2     | 1                                | 8         | Mycoplasma pneumoniae pneumonia, pulmonary consolidation (with pulmonary cavity), pleural effusion, parasitic infection (Metacercaria?)    | 1.Bronchopneumonia.2..Bilateral pneumonia with consolidation, right lower lobe with cavity, pleural effusion                     | ADV、MP               | 0                                                             | 0                                      | 7.38E+03                                     | 1:1280                                            | 0                             | 0                                                     |
| S45                              | 2     | 2                                | 6         | Pneumonia, lung consolidation                                                                                                              | 1.Right upper lung pneumonia with segmental lung consolidation                                                                   | ADV、MP               | 0                                                             | 0                                      | 6.35E+05                                     | 1:1280                                            | 0                             | 0                                                     |
| S46                              | 2     | 2                                | 12        | Cystic fibrosis, bronchiectasis, chronic diarrhea (pancreatic exocrine insufficiency), nasal and sinus diseases (sinusitis), influenza (A) | 2.Bilateral bronchiectasis with pneumonia                                                                                        | ADV、HBoV、MP          | 0                                                             | 0                                      | 3.35E+03                                     | 0                                                 | Pseudomonas aeruginosa        | Chronic diarrhea with pancreas exocrine insufficiency |

| Clinical information of 90 cases |       |                                  |           |                                                                                                                |                                                                                                         |                      |                                                               |                                        |                                              |                                                   |                               |                                                  |
|----------------------------------|-------|----------------------------------|-----------|----------------------------------------------------------------------------------------------------------------|---------------------------------------------------------------------------------------------------------|----------------------|---------------------------------------------------------------|----------------------------------------|----------------------------------------------|---------------------------------------------------|-------------------------------|--------------------------------------------------|
| Sample ID                        | Month | Gender :1 for male, 2 for female | Age(year) | Discharged with Diagnosis                                                                                      | Imaging:1 for the chest X-ray, 2 for CT scan-chest:                                                     | Multiple PCR results | DFA (1.RSV 2.FLU A 3.FLU B 4.PIV1 5.PIV2 6.PIV3 7.ADV 8.hMPV) | Real-time RT-PCR for rhinoviruses (RV) | Real-time PCR for Mycoplasma pneumoniae (MP) | Serum antibodies against M. hyopneumoniae(MP-IgM) | Alveolar Lavage Fluid Culture | Underlying diseases                              |
| S47                              | 2     | 1                                | 2.8       | Mycoplasma pneumoniae pneumonia, lung consolidation                                                            | 1.Left lung pneumonia.2.Pneumonia, left upper lung consolidation and atelectasis                        | ADV、MP、HCoV-C229E    | 0                                                             | 0                                      | >1.00E+08                                    | 1:1280                                            | 0                             | 0                                                |
| S48                              | 3     | 1                                | 0.7       | Pneumonia (adenovirus infection), lung consolidation, pleural effusion, liver dysfunction, rotavirus enteritis | 1. Inflammation in both lungs.2.Double pneumonitis with partial lung consolidation and pleural effusion | ADV、MP               | 0                                                             | 1                                      | 0                                            | 0                                                 | 0                             | 0                                                |
| S49                              | 3     | 2                                | 8         | Mycoplasma pneumoniae pneumonia, lung consolidation (right lower lung), pleural effusion (right), epilepsy     | 1.Right lung inflammation and pleural effusion                                                          | ADV、MP               | 8                                                             | 0                                      | 3.05E+06                                     | /                                                 | 0                             | Epilepsy                                         |
| S50                              | 3     | 2                                | 4.6       | Pneumonia                                                                                                      | 1.Bilateral lower lobe pneumonia                                                                        | ADV、MP               | 0                                                             | 0                                      | 0                                            | /                                                 | 0                             | 0                                                |
| S51                              | 3     | 1                                | 3.1       | Mycoplasma pneumonia, Prader-Willi syndrome                                                                    | 1.Bronchopneumonia                                                                                      | ADV、MP               | 0                                                             | 0                                      | 0                                            | 0                                                 | 0                             | Prader - Willi syndrome                          |
| S52                              | 3     | 2                                | 0.7       | Mycoplasma pneumoniae pneumonia, lung consolidation                                                            | 1.Pneumonia.2. Left lower lobe pneumonia, lung consolidation                                            | ADV、MP               | 0                                                             | 0                                      | 0                                            | 1:1280                                            | 0                             | 0                                                |
| S53                              | 3     | 1                                | 1.7       | Immunodeficiency (chronic granulomatous disease), pulmonary infection, diarrhea                                | 1.Bilateral interstitial pneumonia.2.Bilateral interstitial pneumonia                                   | ADV、MP               | 0                                                             | 0                                      | 0                                            | 0                                                 | 0                             | Immune deficiency(chronic granulomatous disease) |

| Clinical information of 90 cases |       |                                  |           |                                                                                                                                         |                                                                                                                                      |                      |                                                               |                                        |                                              |                                                   |                               |                     |
|----------------------------------|-------|----------------------------------|-----------|-----------------------------------------------------------------------------------------------------------------------------------------|--------------------------------------------------------------------------------------------------------------------------------------|----------------------|---------------------------------------------------------------|----------------------------------------|----------------------------------------------|---------------------------------------------------|-------------------------------|---------------------|
| Sample ID                        | Month | Gender :1 for male, 2 for female | Age(year) | Discharged with Diagnosis                                                                                                               | Imaging:1 for the chest X-ray, 2 for CT scan-chest:                                                                                  | Multiple PCR results | DFA (1.RSV 2.FLU A 3.FLU B 4.PIV1 5.PIV2 6.PIV3 7.ADV 8.hMPV) | Real-time RT-PCR for rhinoviruses (RV) | Real-time PCR for Mycoplasma pneumoniae (MP) | Serum antibodies against M. hyopneumoniae(MP-IgM) | Alveolar Lavage Fluid Culture | Underlying diseases |
| S54                              | 3     | 2                                | 2.5       | Tuberous sclerosis, pneumonia, gastroenteritis                                                                                          | 1.Pneumonia                                                                                                                          | FLUA、MP              | 1                                                             | 0                                      | 0                                            | 0                                                 | 0                             | Tuberous sclerosis  |
| S55                              | 3     | 1                                | 2.8       | Mycoplasma pneumoniae pneumonia, lung consolidation                                                                                     | 1.Left lung pneumonia, with segmentary atelectasis.2.Pneumonia, left upper lobe segmental atelectasis                                | ADV、MP               | 0                                                             | 0                                      | 1.84E+04                                     | 1:1280                                            | 0                             | 0                   |
| S56                              | 3     | 2                                | 6         | Pneumonia, lung consolidation (lower left lung)                                                                                         | 1.Pneumonia.2.Left lower lobe pneumonia, with atelectasis                                                                            | ADV、MP               | 0                                                             | 0                                      | 4.75E+04                                     | /                                                 | 0                             | 0                   |
| S57                              | 3     | 1                                | 3.7       | Severe pneumonia, respiratory failure, rhinovirus infection, lung consolidation, pleural effusion, myocardial damage, liver dysfunction | 1.Pneumonia.2.Pneumonia, left lung partial consolidation and atelectasis, bilateral pleural effusion                                 | ADV、MP               | 0                                                             | 0                                      | 0                                            | 0                                                 | 0                             | 0                   |
| S58                              | 3     | 2                                | 6         | Pneumonia, pulmonary consolidation, mycoplasma infection, pleural effusion, pulmonary necrosis, pulmonary embolism, pulmonary cavity    | 1.Pneumonia, with right lung pleural effusion.2.Right lung pneumonia, middle and lower lobe consolidation,bilateral pleural effusion | ADV、MP               | 0                                                             | 0                                      | 1.55E+04                                     | 1:1280                                            | 0                             | 0                   |
| S59                              | 3     | 1                                | 1.3       | Pneumonia, lung consolidation                                                                                                           | 1.Pneumonia, left lower lobe segmental consolidation                                                                                 | MP                   | 0                                                             | 0                                      | 0                                            | 0                                                 | Streptococcus pneumoniae      | 0                   |

| Clinical information of 90 cases |       |                                  |           |                                                                                |                                                                                                                                                             |                      |                                                               |                                        |                                              |                                                   |                               |                     |
|----------------------------------|-------|----------------------------------|-----------|--------------------------------------------------------------------------------|-------------------------------------------------------------------------------------------------------------------------------------------------------------|----------------------|---------------------------------------------------------------|----------------------------------------|----------------------------------------------|---------------------------------------------------|-------------------------------|---------------------|
| Sample ID                        | Month | Gender :1 for male, 2 for female | Age(year) | Discharged with Diagnosis                                                      | Imaging:1 for the chest X-ray, 2 for CT scan-chest:                                                                                                         | Multiple PCR results | DFA (1.RSV 2.FLU A 3.FLU B 4.PIV1 5.PIV2 6.PIV3 7.ADV 8.hMPV) | Real-time RT-PCR for rhinoviruses (RV) | Real-time PCR for Mycoplasma pneumoniae (MP) | Serum antibodies against M. hyopneumoniae(MP-IgM) | Alveolar Lavage Fluid Culture | Underlying diseases |
| S60                              | 3     | 1                                | 2.5       | Pneumonia, lung consolidation                                                  | 2.Bronchopneumonia, right lower lobe consolidation, right long pleural effusion                                                                             | MP、HCoV-C229E        | 0                                                             | 0                                      | 2.46E+05                                     | 1:160                                             | 0                             | 0                   |
| S61                              | 3     | 1                                | 2.1       | Mycoplasma pneumoniae                                                          | 1.Bronchitis.2.Bilateral lung pneumonia                                                                                                                     | MP                   | 0                                                             | 0                                      | 7.98E+06                                     | 1:640                                             | 0                             | 0                   |
| S62                              | 3     | 1                                | 1.3       | Pneumococcal pneumonia (with adenovirus), lung consolidation, pleural effusion | 1.Right lung pneumonia with pleural effusion on the right.2. Right lower lobe pneumonia with partial consolidation and atelectasis, pleural effusion        | ADV、MP、HCoV-C229E    | 7                                                             | 0                                      | 0                                            | 0                                                 | 0                             | 0                   |
| S63                              | 3     | 1                                | 2.11      | Mycoplasma pneumoniae, lung consolidation, rotavirus enteritis                 | 1.Pneumonia.2.Bilateral lung pneumonia with segmental consolidation                                                                                         | ADV、MP               | 0                                                             | 0                                      | 7.83E+06                                     | 1:1280                                            | 0                             | 0                   |
| S64                              | 3     | 2                                | 1.9       | Pneumonia, lung consolidation, mycoplasma pneumoniae                           | 1.Right lung pneumonia with right upper lobe atelectasis. 2.Pneumonia, right upper lobe consolidation, right middle and lower lobe subsegmental atelectasis | ADV、MP               | 0                                                             | 0                                      | 3.18E+06                                     | /                                                 | 0                             | 0                   |
| S65                              | 3     | 1                                | 1.2       | Pneumonia (parainfluenza virus infection, adenovirus infection)                | 1.Pneumonia                                                                                                                                                 | ADV、MP、PIV3          | 6.7                                                           | 0                                      | 0                                            | 0                                                 | 0                             | 0                   |

| Clinical information of 90 cases |       |                                  |           |                                                                                                     |                                                                                                                                  |                      |                                                               |                                        |                                              |                                                   |                               |                     |
|----------------------------------|-------|----------------------------------|-----------|-----------------------------------------------------------------------------------------------------|----------------------------------------------------------------------------------------------------------------------------------|----------------------|---------------------------------------------------------------|----------------------------------------|----------------------------------------------|---------------------------------------------------|-------------------------------|---------------------|
| Sample ID                        | Month | Gender :1 for male, 2 for female | Age(year) | Discharged with Diagnosis                                                                           | Imaging:1 for the chest X-ray, 2 for CT scan-chest:                                                                              | Multiple PCR results | DFA (1.RSV 2.FLU A 3.FLU B 4.PIV1 5.PIV2 6.PIV3 7.ADV 8.hMPV) | Real-time RT-PCR for rhinoviruses (RV) | Real-time PCR for Mycoplasma pneumoniae (MP) | Serum antibodies against M. hyopneumoniae(MP-IgM) | Alveolar Lavage Fluid Culture | Underlying diseases |
| S66                              | 3     | 1                                | 1.1       | Bronchopneumonia                                                                                    | 1.Bronchopneumonia                                                                                                               | ADV、MP、PIV3          | 0                                                             | 0                                      | 0                                            | 0                                                 | 0                             | 0                   |
| S67                              | 3     | 2                                | 1.2       | Pneumonia, lung consolidation, pleural effusion, abnormal liver function, anemia (mild to moderate) | 1.Pneumonia, with right lung pleural effusion. 2.Bilateral lung pneumonia with partial subsegmental atelectasis,pleural effusion | ADV、MP               | 0                                                             | 0                                      | 0                                            | 0                                                 | 0                             | 0                   |
| S68                              | 3     | 1                                | 1.9       | Adenovirus pneumonia, lung consolidation                                                            | 1.Pneumonia. 2.Pneumonia, right lower lobe segmental consolidation                                                               | ADV、MP               | 0                                                             | 0                                      | 0                                            | 0                                                 | 0                             | 0                   |
| S69                              | 3     | 1                                | 6         | Influenza (A), Mycoplasma pneumoniae (lung consolidation)                                           | 2.Pneumonia, left upper lobe consolidation and atelectatic                                                                       | ADV                  | 2.7                                                           | 0                                      | 1.83E+05                                     | 1:640                                             | 0                             | 0                   |
| S70                              | 3     | 2                                | 7         | Influenza (A), mycoplasma pneumoniae                                                                | 1.Pneumonia                                                                                                                      | ADV、MP               | 2                                                             | 0                                      | 0                                            | 1:1280                                            | 0                             | 0                   |
| S71                              | 3     | 1                                | 3.5       | Mycoplasma pneumoniae                                                                               | 1.Pneumonia.2.Bilateral lung pneumonia, pleural effusion                                                                         | ADV、MP               | 6                                                             | 1                                      | /                                            | 1:1280                                            | 0                             | 0                   |

| Clinical information of 90 cases |       |                                  |           |                                                                                                |                                                                                                                                                          |                      |                                                               |                                        |                                              |                                                   |                               |                                                    |
|----------------------------------|-------|----------------------------------|-----------|------------------------------------------------------------------------------------------------|----------------------------------------------------------------------------------------------------------------------------------------------------------|----------------------|---------------------------------------------------------------|----------------------------------------|----------------------------------------------|---------------------------------------------------|-------------------------------|----------------------------------------------------|
| Sample ID                        | Month | Gender :1 for male, 2 for female | Age(year) | Discharged with Diagnosis                                                                      | Imaging:1 for the chest X-ray, 2 for CT scan-chest:                                                                                                      | Multiple PCR results | DFA (1.RSV 2.FLU A 3.FLU B 4.PIV1 5.PIV2 6.PIV3 7.ADV 8.hMPV) | Real-time RT-PCR for rhinoviruses (RV) | Real-time PCR for Mycoplasma pneumoniae (MP) | Serum antibodies against M. hyopneumoniae(MP-IgM) | Alveolar Lavage Fluid Culture | Underlying diseases                                |
| S72                              | 3     | 2                                | 12        | Mycoplasma pneumoniae pneumonia, lung consolidation, pleural effusion, pericardial effusion    | 1.Bilateral lung pneumonia.2.Bilateral lung pneumonia, right upper lobe consolidation, pleural effusion, pericardial effusion                            | PIV3、RV/EV、MP        | 0                                                             | 0                                      | 6.54E+06                                     | 1:1280                                            | 0                             | 0                                                  |
| S73                              | 3     | 1                                | 0.6       | Pneumonia, lung consolidation, congenital bronchial stenosis, muscular torticollis, hemangioma | 1.Bilateral lung interstitial pneumonia. 2.Bilateral lung pneumonia with bilateral lung multiple subsegmental consolidation, right lung pleural effusion | ADV、hMPV、MP          | 0                                                             | 0                                      | 0                                            | 0                                                 | 0                             | Congenital bronchial stenosis muscular torticollis |
| S74                              | 3     | 1                                | 4.9       | Mycoplasma pneumoniae pneumonia, lung consolidation                                            | 1.Right lower lung pneumonia with consolidation.2. Right lower lung pneumonia with consolidation,atelectasis, right lung pleural effusion                | ADV、FLUB、MP          | 0                                                             | 0                                      | 3.03E+06                                     | 1:1280                                            | 0                             | 0                                                  |
| S75                              | 3     | 2                                | 7         | Mycoplasma pneumoniae pneumonia, lung consolidation, pleural effusion                          | 1.Pneumonia, lung consolidation,bilateral pleural pleural effusion                                                                                       | MP                   | 0                                                             | 0                                      | 3.43E+06                                     | 1:1280                                            | 0                             | 0                                                  |
| S76                              | 3     | 2                                | 5.3       | Pneumonia, lung consolidation                                                                  | 1.Right puer lung pneumonia.2.Bilateral lung pneumonia, right upper and left lower lung consolidation                                                    | ADV、MP               | 0                                                             | 0                                      | 2.32E+04                                     | /                                                 | 0                             | 0                                                  |

| Clinical information of 90 cases |       |                                  |           |                                                                                      |                                                                                                                              |                       |                                                               |                                        |                                              |                                                   |                               |                     |
|----------------------------------|-------|----------------------------------|-----------|--------------------------------------------------------------------------------------|------------------------------------------------------------------------------------------------------------------------------|-----------------------|---------------------------------------------------------------|----------------------------------------|----------------------------------------------|---------------------------------------------------|-------------------------------|---------------------|
| Sample ID                        | Month | Gender :1 for male, 2 for female | Age(year) | Discharged with Diagnosis                                                            | Imaging:1 for the chest X-ray, 2 for CT scan-chest:                                                                          | Multiple PCR results  | DFA (1.RSV 2.FLU A 3.FLU B 4.PIV1 5.PIV2 6.PIV3 7.ADV 8.hMPV) | Real-time RT-PCR for rhinoviruses (RV) | Real-time PCR for Mycoplasma pneumoniae (MP) | Serum antibodies against M. hyopneumoniae(MP-IgM) | Alveolar Lavage Fluid Culture | Underlying diseases |
| S77                              | 3     | 1                                | 6         | Bronchial asthma (non-critical), mycoplasma pneumoniae, lung consolidation           | 1. Left lung pneumonia, left lower lobe segmentary consolidation, left lung pleural effusion                                 | ADV、MP                | 0                                                             | 0                                      | 8.13E+04                                     | 1:320                                             | 0                             | Bronchial asthma    |
| S78                              | 3     | 1                                | 9         | Influenza (A), pneumonia (lung consolidation)                                        | 1.Right middle lobe pneumonia and consolidation atelectasis                                                                  | ADV、MP、PIV2           | 2                                                             | 0                                      | 1.72E+07                                     | 0                                                 | 0                             | 0                   |
| S79                              | 3     | 2                                | 8         | Influenza a, pneumonia (Staphylococcus aureus)                                       | 1.Right upper and lower lung pneumonia.2.Pneumonia, right upper lobe and left lower lobe segmental consolidation atelectasis | ADV、MP                | 0                                                             | 0                                      | 0                                            | 0                                                 | Staphylococcus aureus         | 0                   |
| S80                              | 3     | 1                                | 2.4       | Pneumonia, lung consolidation, mycoplasma pneumoniae infection, adenovirus infection | 1.Pneumonia, consolidation,segmentary atelectasis                                                                            | ADV、MP、HCoV-NL63/HKU1 | 7                                                             | 0                                      | 0                                            | 1:1280                                            | 0                             | 0                   |
| S81                              | 3     | 1                                | 0.8       | Pneumonia, lung consolidation, adenovirus infection                                  | 1.Pneumonia.2.Pneumonia, partial consolidation                                                                               | ADV、MP、HCoV-NL63/HKU1 | 7                                                             | 0                                      | 0                                            | 0                                                 | 0                             | 0                   |
| S82                              | 3     | 1                                | 6         | Pneumonia, lung consolidation                                                        | 1.Pneumonia, left lower lobe partial consolidation                                                                           | ADV、FLUA、MP           | 0                                                             | 0                                      | 8.80E+05                                     | /                                                 | 0                             | 0                   |

| Clinical information of 90 cases |       |                                  |           |                                                                                                                                               |                                                                                                                                                                        |                      |                                                               |                                        |                                              |                                                    |                               |                                                    |
|----------------------------------|-------|----------------------------------|-----------|-----------------------------------------------------------------------------------------------------------------------------------------------|------------------------------------------------------------------------------------------------------------------------------------------------------------------------|----------------------|---------------------------------------------------------------|----------------------------------------|----------------------------------------------|----------------------------------------------------|-------------------------------|----------------------------------------------------|
| Sample ID                        | Month | Gender :1 for male, 2 for female | Age(year) | Discharged with Diagnosis                                                                                                                     | Imaging:1 for the chest X-ray, 2 for CT scan-chest:                                                                                                                    | Multiple PCR results | DFA (1.RSV 2.FLU A 3.FLU B 4.PIV1 5.PIV2 6.PIV3 7.ADV 8.hMPV) | Real-time RT-PCR for rhinoviruses (RV) | Real-time PCR for Mycoplasma pneumoniae (MP) | Serum antibodies against M. hypopneumoniae(MP-IgM) | Alveolar Lavage Fluid Culture | Underlying diseases                                |
| S83                              | 3     | 2                                | 3         | Pneumonia (metapneumovirus), lung consolidation, (right) unilateral emphysema, mycoplasma pneumoniae infection, vulva and vaginal candidiasis | 1.Left lung pneumonia,subsegmentary atelectasis.2.Bilateral lung pneumonia, right upper and lower lobe segmental consolidation, atelectasis, right lung and left lower | ADV、HCoV-NL63/HKU 1  | 0                                                             | 0                                      | 0                                            | 1:1280                                             | 0                             | 0                                                  |
| S84                              | 3     | 1                                | 4.8       | Mycoplasma pneumoniae pneumonia, lung consolidation                                                                                           | 1.Pneumonia, right upper lung atelectasis                                                                                                                              | ADV、MP、HCoV-C229E    | 0                                                             | 0                                      | 1.63E+06                                     | 1:1280                                             | 0                             | 0                                                  |
| S85                              | 3     | 1                                | 3.1       | Pneumonia (adenovirus), lung consolidation, pleural effusion (left), vascular malformation                                                    | 1.Bronchopneumonia.2.Right lung pneumonia, left lower lobe consolidation, left lung pleural effusion                                                                   | ADV、MP               | 0                                                             | 0                                      | 2.40E+04                                     | 0                                                  | 0                             | 0                                                  |
| S86                              | 3     | 2                                | 5.1       | Mycoplasma pneumoniae pneumonia, lung consolidation, pleural effusion, liver dysfunction, hypoproteinemia                                     | 1.Left lower lung pneumoniae pneumonia, lung consolidation, pleural effusion                                                                                           | ADV、MP、PIV2          | 0                                                             | 0                                      | 2.27E+07                                     | 1:1280                                             | 0                             | 0                                                  |
| S87                              | 3     | 1                                | 3.7       | Pneumonia (rhinovirus, mycoplasma infection), congenital malformation (absence of single kidney)                                              | 1.Pneumonia                                                                                                                                                            | MP、HCoV-C229E        | 0                                                             | 1                                      | 4.13E+03                                     | 1:1280                                             | 0                             | Congenital malformation (single kidney deficiency) |
| S88                              | 3     | 2                                | 7         | Pneumonia, atelectasis                                                                                                                        | 1.Bronchitis.2.Pneumonia, left upper lobe subsegmental atelectasis                                                                                                     | ADV、MP、PIV2          | 0                                                             | 0                                      | 2.31E+04                                     | /                                                  | 0                             | 0                                                  |



| Clinical information of 90 cases |       |                                  |           |                                                                                                 |                                                                                                                                                        |                      |                                                               |                                      |                                              |                                                   |                               |                                          |
|----------------------------------|-------|----------------------------------|-----------|-------------------------------------------------------------------------------------------------|--------------------------------------------------------------------------------------------------------------------------------------------------------|----------------------|---------------------------------------------------------------|--------------------------------------|----------------------------------------------|---------------------------------------------------|-------------------------------|------------------------------------------|
| Sample ID                        | Month | Gender :1 for male, 2 for female | Age(year) | Discharged with Diagnosis                                                                       | Imaging:1 for the chest X-ray, 2 for CT scan-chest:                                                                                                    | Multiple PCR results | DFA (1.RSV 2.FLU A 3.FLU B 4.PIV1 5.PIV2 6.PIV3 7.ADV 8.hMPV) | Real-time RT-PCR for rhinovirus (RV) | Real-time PCR for Mycoplasma pneumoniae (MP) | Serum antibodies against M. hyopneumoniae(MP-IgM) | Alveolar Lavage Fluid Culture | Underlying diseases                      |
| S89                              | 3     | 1                                | 6         | Mycoplasma pneumoniae pneumonia, lung consolidation, pleural effusion, cough variant asthma     | 2.Bilateral lung pneumonia, right lower lobe consolidation and atelectasis, bilateral lung pleural effusion                                            | ADV、MP               | 0                                                             | 0                                    | 1.34E+04                                     | 1:160                                             | 0                             | 0                                        |
| S90                              | 3     | 1                                | 0.8       | Pneumonia, lung consolidation, liver dysfunction, congenital heart disease (after surgery)      | 1.Pneumonia, consolidation, bilateral lung effusion.2.Bilateral lung pneumonia, multiple segmental lung consolidation; bilateral lung pleural reaction | ADV、MP、HCoV-OC43     | 7                                                             | 0                                    | 0                                            | 0                                                 | 0                             | Congenital heart disease (postoperative) |
| S91                              | 3     | 2                                | 7         | Mycoplasma pneumoniae, viral infection (metapneumovirus), lung consolidation, liver dysfunction | 1.Right lower lung pneumonia, consolidation                                                                                                            | ADV、MP               | 8                                                             | 0                                    | 4.13E+06                                     | 1:1280                                            | 0                             | 0                                        |

1.S43 and S47 were from one same case;2."/"/ for no examination;3.MP-IgM was detected by an ELISA method(Human Mycoplasma pneumoniae antibody ELISA kit, Wuhan Yipu Biotechnology Co.Ltd, Wuhan, China).

**Table S1**

Results of 91 samples tested by RespiFinder 2SMART Multi-PCR and Conventional

Tests

| pathogen                 | No. of Multi-PCR / CT | pathogens                | No. of Multi-PCR / CT | pathogens                 | No. of Multi-PCR / CT | pathogens                      | No. of Multi-PCR / CT |
|--------------------------|-----------------------|--------------------------|-----------------------|---------------------------|-----------------------|--------------------------------|-----------------------|
| <b>MP</b>                | 6/42                  | MP, ADV                  | 47/2                  | MP, ADV, FLUA             | 1/2                   | MP, ADV, PIV3, HCoV-C229E      | 1/0                   |
| <b>ADV</b>               | 1/5                   | MP, RV                   | 1/2                   | MP, RV, PIV3              | 1/0                   | MP, ADV, FLUA, H1N1-2009       | 1/0                   |
| <b>RV/EV</b>             | 0/2                   | MP, FLUA                 | 2/2                   | ADV, FLUA, hMPV           | 0/0                   | MP, FLUA, HBoV, HCoV-NL63/HKU1 | 1/0                   |
| <b>RSV</b>               | 0/1                   | MP, hMPV                 | 1/2                   | MP, FLUA, RSV             | 0/1                   | MP, FLUA, HBoV, H1N1-2009      | 1/0                   |
| <b>FLUA</b>              | 0/2                   | MP, PA                   | 0/1                   | MP, ADV, RSV              | 0/1                   |                                |                       |
| <b>SP</b>                | 0/2                   | ADV, RSV                 | 1/1                   | MP+ADV+PIV2               | 3/0                   |                                |                       |
| <b>SA</b>                | 0/1                   | ADV, PIV3                | 0/1                   | MP, ADV, HCoV-C229E       | 3/0                   |                                |                       |
|                          |                       | MP, HCoV-OC43            | 2/0                   | MP, ADV, HCoV-OC43        | 2/0                   |                                |                       |
|                          |                       | MP, HCoV-C229E           | 2/0                   | MP, ADV, HCoV-NL63/HKU1   | 2/0                   |                                |                       |
|                          |                       | ADV, FLUA                | 1/0                   | MP, ADV, H1N1-2009        | 2/0                   |                                |                       |
|                          |                       | ADV, HCoV-NL63/HKU1      | 1/0                   | MP, ADV, HBoV             | 3/0                   |                                |                       |
|                          |                       | RV, PIV3                 | 0/1                   | MP, ADV, PIV3             | 2/0                   |                                |                       |
|                          |                       |                          |                       | MP, ADV, FLUB             | 1/0                   |                                |                       |
|                          |                       |                          |                       | MP, ADV, hMPV             | 1/0                   |                                |                       |
|                          |                       |                          |                       | MP, FLUA, HBoV            | 1/0                   |                                |                       |
| Unique pathogen (n=7/55) |                       | Dual pathogens (n=58/12) |                       | Triple pathogens (n=22/4) |                       | Quadruple pathogens(n=4/0)     |                       |

(PA: Pseudomonas aeruginosa; SA, Staphylococcus aureus; SP, Streptococcus pneumonia;  
The Multi-PCR targeted pan-RV/EV).

**Table S2**

Sensitivity and specificity of RespiFinder 2SMART Multi-PCR compared with DFA for 8 viruses.

|                                      | DFA for 8 viruses          |             |          |
|--------------------------------------|----------------------------|-------------|----------|
|                                      | Positive(n)                | Negative(n) | Total(n) |
| <b>Multi-PCR</b>                     |                            |             |          |
| <b>Positive (n)</b>                  | 20                         | 60          | 80       |
| <b>Negative (n)</b>                  | 1                          | 10          | 11       |
| <b>Total (n)</b>                     | 21                         | 70          | 91       |
| <b>Positive Predictive Value (%)</b> | 25.00 (95%CI, 16.28-36.15) |             |          |
| <b>Negative Predictive Value (%)</b> | 90.91 (95%CI, 57.12-99.52) |             |          |
| <b>Sensitivity (%)</b>               | 95.23 (95%CI, 74.13-99.75) |             |          |
| <b>Specificity (%)</b>               | 14.39 (95%CI, 7.43-25.17)  |             |          |

**Table S3**

Sensitivity and specificity of RespiFinder 2SMART Multi-PCR compared with Real-time PCR for MP and DFA for ADV.

|                                      | Real-time PCR for MP       |             |          | DFA for ADV                |             |          |
|--------------------------------------|----------------------------|-------------|----------|----------------------------|-------------|----------|
|                                      | Positive(n)                | Negative(n) | Total(n) | Positive(n)                | Negative(n) | Total(n) |
| <b>Multi-PCR</b>                     |                            |             |          |                            |             |          |
| <b>Positive (n)</b>                  | 54                         | 29          | 83       | 11                         | 61          | 72       |
| <b>Negative (n)</b>                  | 1                          | 2           | 3        | 1                          | 18          | 19       |
| <b>Total (n)</b>                     | 55                         | 31          | 86       | 12                         | 79          | 91       |
| <b>Positive Predictive Value (%)</b> | 65.06 (95%CI, 53.72-74.98) |             |          | 15.27 (95CI, 8.23-26.11)   |             |          |
| <b>Negative Predictive Value (%)</b> | 66.67 (95%CI, 12.53-98.23) |             |          | 94.73 (95%CI, 71.89-99.72) |             |          |
| <b>Sensitivity (%)</b>               | 98.18 (95%CI, 89.00-99.90) |             |          | 91.66 (95%CI, 59.75-99.56) |             |          |
| <b>Specificity (%)</b>               | 6.45 (95%CI, 1.12-22.84)   |             |          | 22.78 (95%CI, 14.40-33.85) |             |          |

**Table S4**

Sensitivity and specificity of the RespiFinder 2SMART Multi-PCR compared with CT for pathogens (8 viruses, RV/EV and MP).

|                                      | CT                         |              |           |
|--------------------------------------|----------------------------|--------------|-----------|
|                                      | Positive (n)               | Negative (n) | Total (n) |
| <b>Multi-PCR</b>                     |                            |              |           |
| <b>Positive (n)</b>                  | 69                         | 22           | 91        |
| <b>Negative (n)</b>                  | 0                          | 0            | 0         |
| <b>Total (n)</b>                     | 69                         | 22           | 91        |
| <b>Positive Predictive Value (%)</b> | 73.17 (95%CI, 62.05-82.08) |              |           |
| <b>Negative Predictive Value (%)</b> | -                          |              |           |
| <b>Sensitivity (%)</b>               | 100 (95%CI, 81.50-100)     |              |           |
| <b>Specificity (%)</b>               | 0.00 (95%CI, 0.00-6.57)    |              |           |
